# Supplementary material for: Use of spatiotemporal characteristics of ambient PM2.5 in rural South India to infer local versus regional contributions
Source: PubMed Central journal article supplement (PMC5980999; doi:10.1016/j.envpol.2018.04.057), 2018-08
Supplement: mmc1.pdf [file mmc1.pdf]

1 **Supplementary information**

2 **Use of spatiotemporal characteristics of ambient PM<sub>2.5</sub> in rural South India to infer**

3 **local versus regional contributions**

4 M. Kishore Kumar, V. Sreekanth, Maëlle Salmon, Cathryn Tonne,

5 Julian D. Marshall

6

7 Contents

8 **SI.1 methods**

9 SI. 1.1 Alternate under-writing function

10 SI. 1.2 Estimation of atmospheric transport and diffusion

11 **SI. 2 Results**

12 Figure SI. 2.1. Real time RH correction

13 Figure SI. 2.2. eBAM-DustTrak collocation

14 Figure SI. 2.3. Distributions of PM<sub>2.5</sub> concentrations measured at three ambient sites

15 Figure SI. 2.4. Week wise PM<sub>2.5</sub> at the three rural sites

16 Figure SI. 2.5. Data Availability

17 Figure SI. 2.6. Season wise PM<sub>2.5</sub> variations at the three sites based on common days data

18 Figure SI. 2.7. Box plots of skew variations at three rural sites

19 Figure SI. 2.8. Season wise urban-rural PM<sub>2.5</sub> variations

20 Figure SI. 2.9. Local and regional scale contributions using alternate underwriting function

21 Figure SI. 2.10. Locations of brick kilns and rice mills around three rural sites

22 Figure SI. 2.11. Season wise wind roses for North site

23 Figure SI. 2.12. Season wise wind roses for Central site

24 Figure SI. 2.13. Season wise wind roses for South site

25 Table SI. 2.1. PM<sub>2.5</sub> concentrations during weekdays and weekends

26 Table SI. 2.2. Season wise ratios of PM<sub>2.5</sub> levels at the three ambient sites

27 Table SI. 2.3. Local source contributions based on moving average subtraction method

28 Table SI. 2.4. Local source contributions based on alternate underwriting function

29 Table SI. 2.5. Percentage of days with stagnation, recirculation, ventilation, and stagnation-

30 recirculation events

31 Table SI. 2.6. Percentage of stagnation, recirculation and ventilation events during various

32 seasons

33 Table SI. 2.7. Hourly median PM<sub>2.5</sub> concentrations ( $\mu\text{g m}^{-3}$ ) during various wind speeds.

34 Table SI. 2.8. Hourly median PM<sub>2.5</sub> concentrations ( $\mu\text{g m}^{-3}$ ) during various wind directions

35 Table SI. 2.9. Average and standard deviations of monthly temperature and relative humidity

36 (RH) over the study area

37

38

39

40 **SI.1 methods**

41 **SI. 1.1 Alternate under-writing function**

42 We used an alternate under writing function to validate the results from the moving average  
43 subtraction method. In the past, few studies reported that the moving average subtraction  
44 method often underestimates the proportion of concentrations attributable to local emissions  
45 and over estimates the strength of regional sources (Both et al., 2011). In the present study,  
46 we employed an alternative underwriting function that selects, for each time point, the second  
47 lowest value from a 360 min moving window.

48 **SI. 1.2 Estimation of atmospheric transport and diffusion**

49 We estimated atmospheric conditions by means of stagnation, ventilation, and recirculation  
50 analysis proposed by Allwine and Whiteman (1994). During stagnation,winds are slow or  
51 stagnant altogether, resulting in accumulation of pollutants in the vicinity of a source. During  
52 recirculation,pollutants are initially transported from source but later return; this pattern  
53 mayresult a pollution episode. During ventilation,polluted air is carried away by fresh air.

54 We calculated the representative integral quantities for stagnation and recirculation using  
55 measured wind speed ( $U_i$ ) and direction ( $D_i$ ). For a given wind speed and direction, the wind  
56 components were expressed as follows:

57 
$$n_i = U_i \cos(D_i - 180) \quad (1)$$

58 
$$e_i = U_i \sin(D_i - 180) \quad (2)$$

59 Where  $i=1, \dots, N$ ,  $n_i$  and  $e_i$  represent North-South and east-west component respectively for  
60 each discrete data point  $i$ .

61 The North-South transport distance ( $X_i$ ) and east-west transport distance ( $Y_i$ ) for an averaging  
62 time interval  $T$  were estimated using equation (3) and (4), respectively.

63 
$$X_i = T \sum_{j=i}^{i+p} n_j \quad (3)$$

64 
$$Y_i = T \sum_{j=i}^{i+p} e_j \quad (4)$$

65 where,  $i=1, \dots, N-p$ ;  $p = \tau/T - 1$ ;  $\tau =$  Transport time.

66 The resultant transport distance ( $L_i$ ) was computed as

67 
$$L_i = \sqrt{X_i^2 + Y_i^2} \quad (5)$$

68 The wind run ( $S_i$ ) and recirculation factor ( $R_i$ ) were computed as

69 
$$S_i = T \sum_{j=i}^{i+p} U_j \quad (6)$$

70 
$$R_i = 1 - \frac{L_i}{S_i} \quad (7)$$

71  
72 If  $S_i \leq S_c$ , asite is prone to stagnation.

73 If  $R_i \geq R_c$ , asite is prone to recirculation.

74 If  $R_i \leq R_{cv}$  and  $S_i \geq S_{cv}$ , a site is prone to ventilation.

75 Here,  $S_c$  and  $R_c$  are average daily critical transport indices (CTIs) for stagnation and  
76 recirculation, respectively. The CTI parameters are estimated as the average wind run and  
77 average recirculation factor during the monitoring period, respectively.  $S_{cv}$  and  $R_{cv}$  are the  
78 CTIs for ventilation and are computed as 75<sup>th</sup> percentile of  $S_i$  and 25<sup>th</sup> percentile of  $R_i$ ,  
79 respectively (Chithra et al., 2014). The transport labels (“stagnation” and “recirculation”) are  
80 not mutually exclusive, that is, a day might receive more than one label.

81

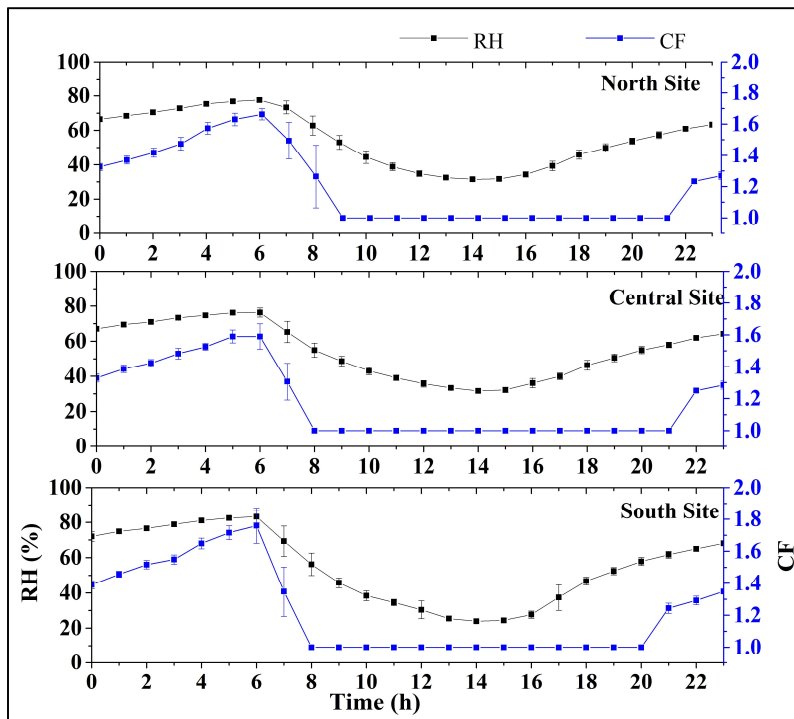

82  
83  
84  
85  
86

**Figure SI.2.1.** Median relative humidity (RH) and nephelometer correction factor by time of day and site (see equations 1 and 2 in main text). Error bars represent interquartile ranges (IQR).

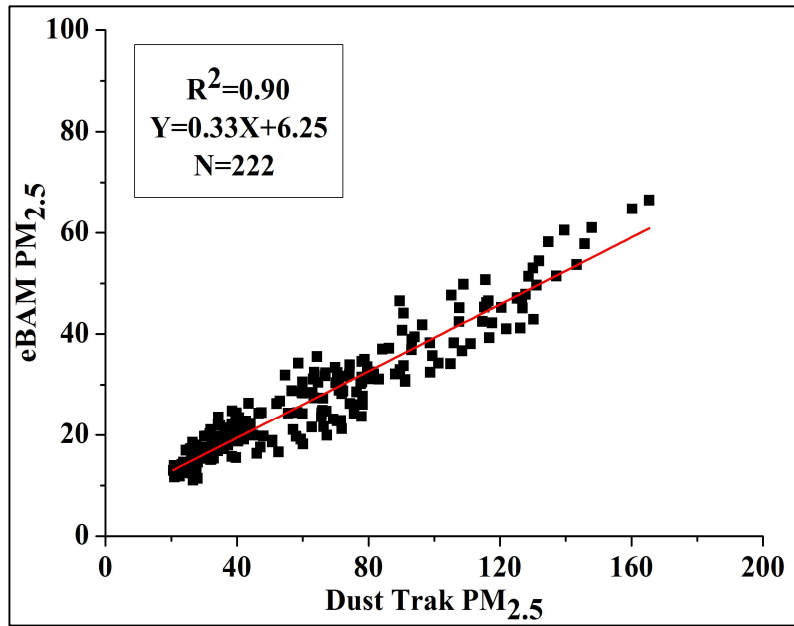

87  
88  
89  
90  
91

**FigureSI.2.2.** Comparison between 24h average  $PM_{2.5}$  concentrations for collocated eBAM and RH-corrected DustTrak measurements. The best-fit line is the correction factor applied to all DustTrak measurements presented in this study.

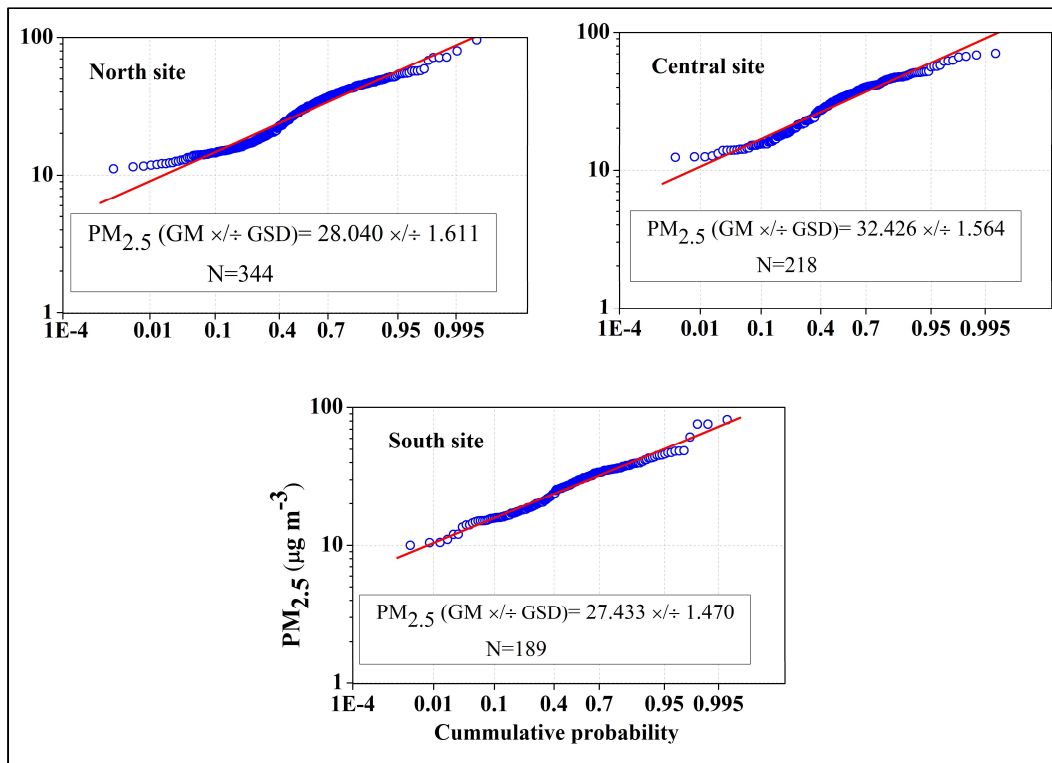

92  
93  
94  
95  
96  
97

**Figure SI.2.3.** Lognormal probability plots for 24 h averaged  $PM_{2.5}$  concentrations measured at north, central and south sites. The lines within figures indicate best-fit lognormal distributions. Text boxes report geometric mean  $\times/\div$  geometric standard deviation; N represents the number of valid samples for each site.

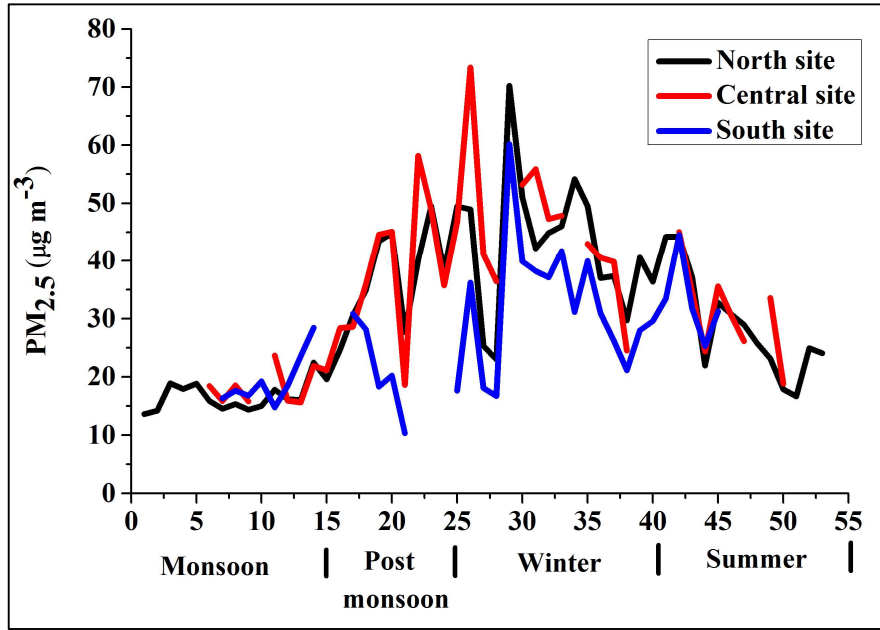

98  
99  
100  
101

**Figure SI. 2.4.** Weekly average PM<sub>2.5</sub> concentrations at the three rural ambient sites. Here, week 1 starts 11 June 2016.

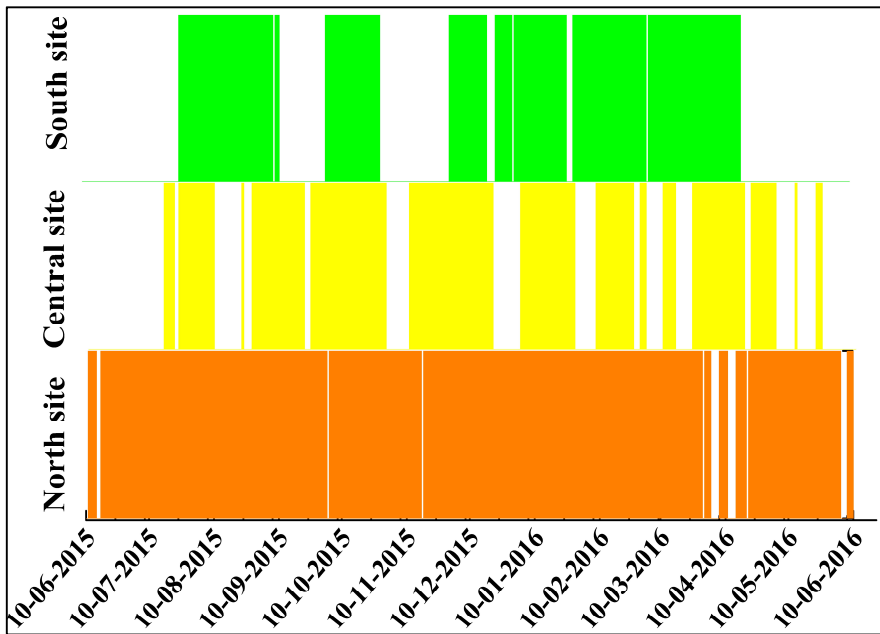

102  
103  
104  
105  
106  
107  
108  
109  
110  
111  
112

**Figure SI.2.5.** PM<sub>2.5</sub> data collection over time (DustTrak and eBAM data) according to site. Gaps represent missing data (e.g., instrument malfunction, power outage). Total data collection: 344 days North site; 218 days Central site; 189 days South site.

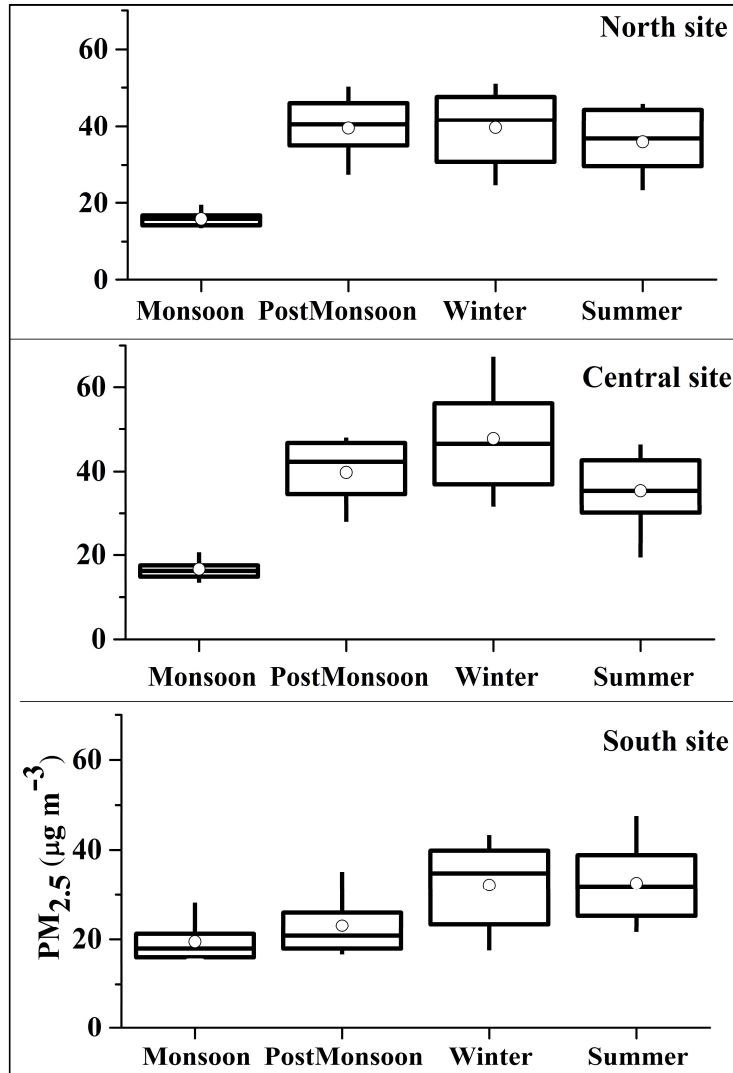

114  
 115  
 116  
 117  
 118

**Figure SI.2.6.** Variability of 24h averaged  $PM_{2.5}$  concentrations according to site and season based on 139 days common data.

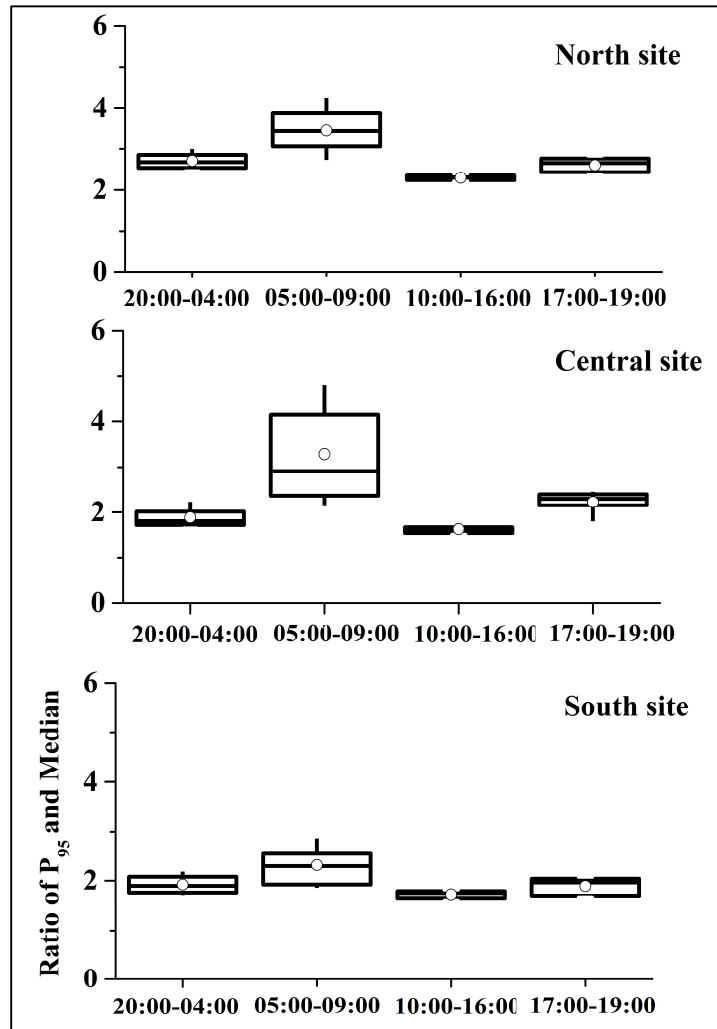

119

120 **Figure SI. 2.7.** Box plots of PM<sub>2.5</sub> concentrations sampled at the three ambient sites showing  
 121 a measure of skew (ratio of minute 95th percentile [P95] to 24h median concentration based  
 122 on 1 min medians of concentration)

123

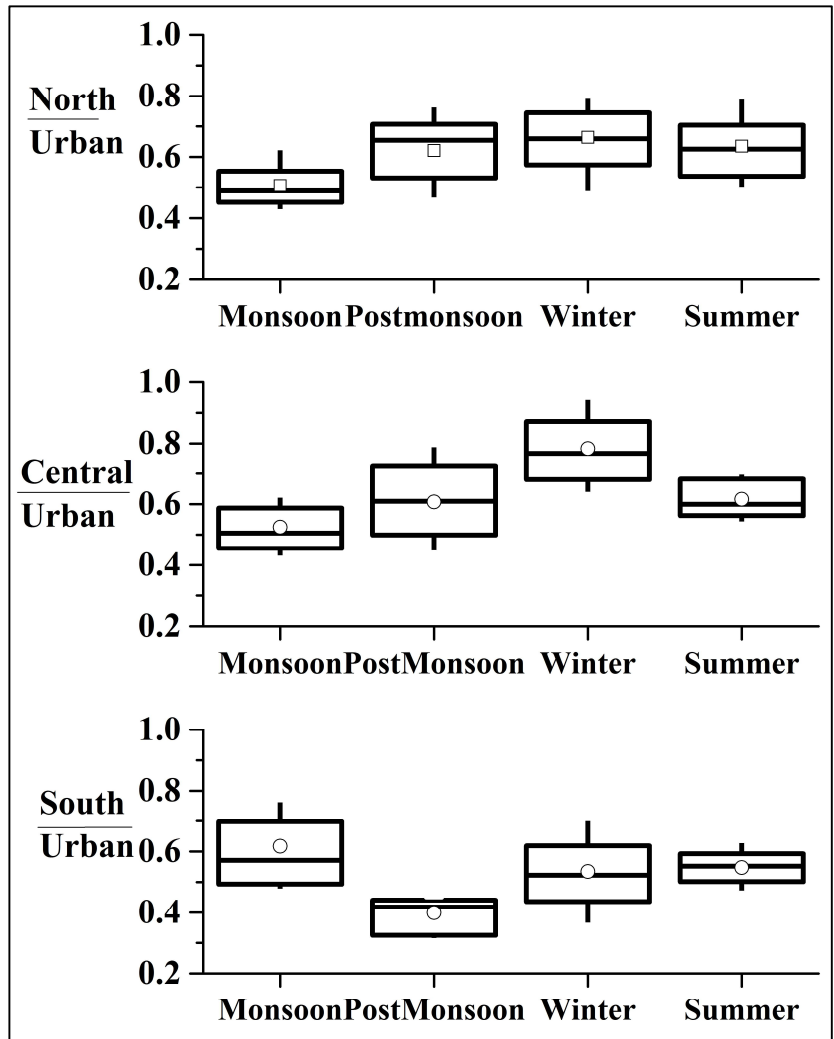

124

125

126

127

128

Figure SI.2.8. Season wise distribution of rural-urban PM<sub>2.5</sub> ratios for three rural sites



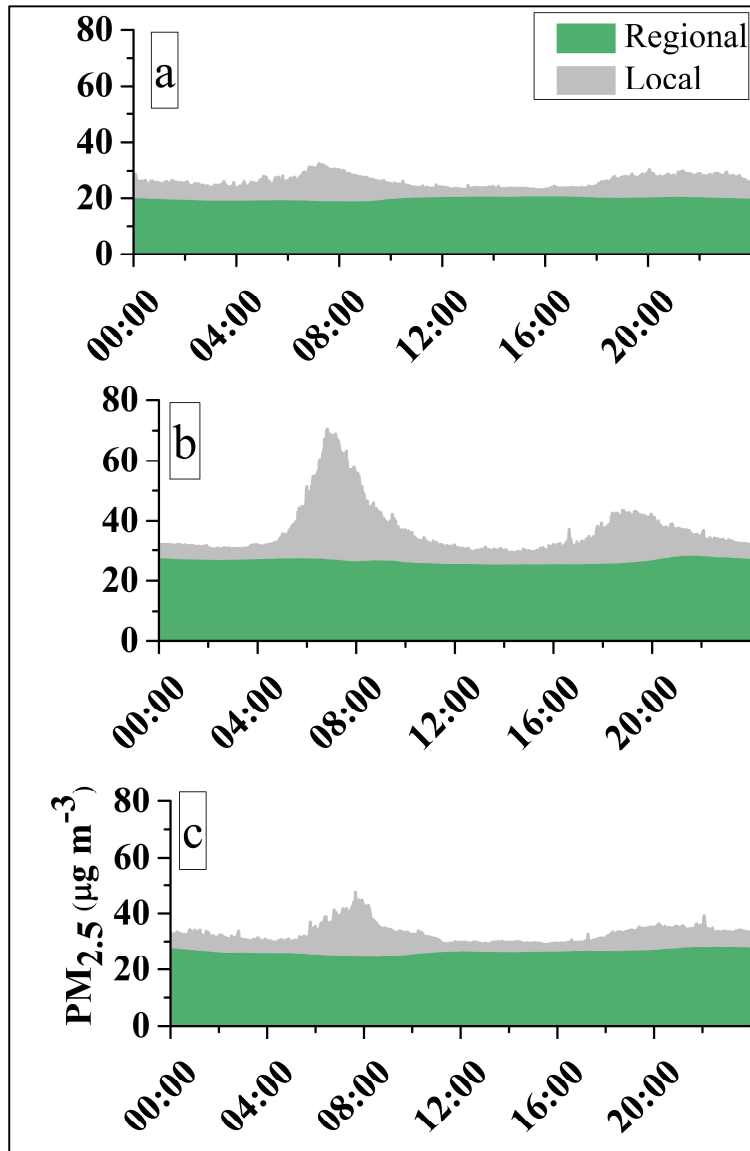

129  
 130  
 131  
 132  
 133  
 134

**Figure SI.2.9.** Median PM<sub>2.5</sub> concentration by local and regional scale contributions, by time of day at (a) North site (b) Central site and (c) South site location using alternate underwriting function

135

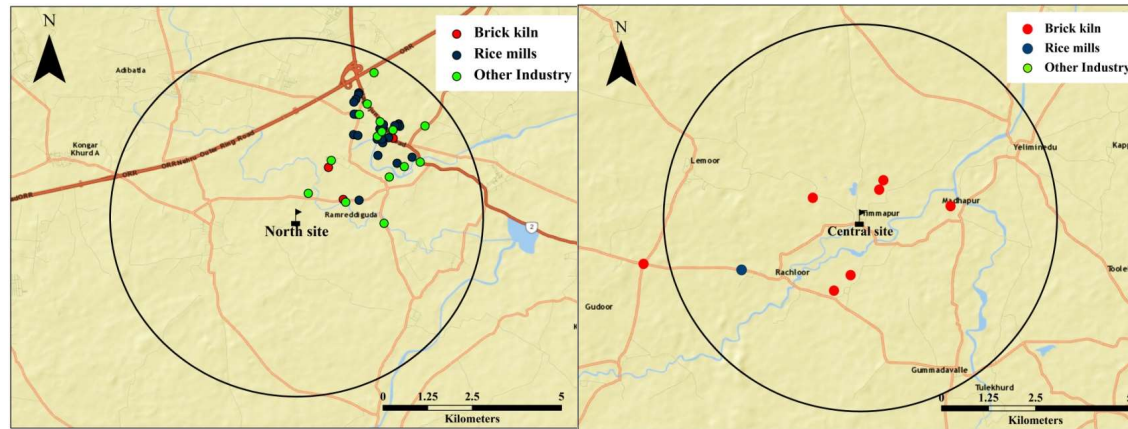

136

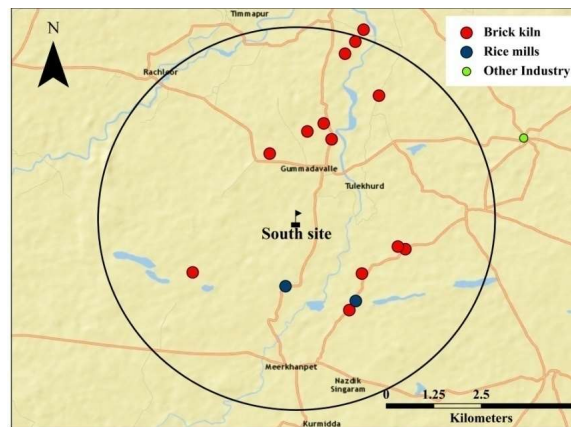

137

138

**Figure SI.2.10.** Aerial view of brick kilns, rice mills and other industries present in 5 km radius around three rural sites.

a

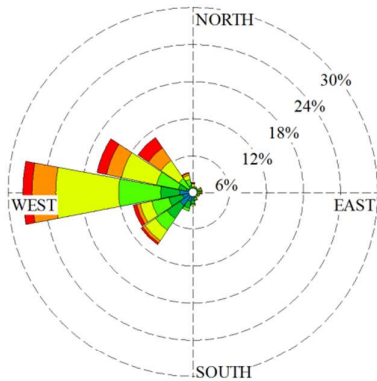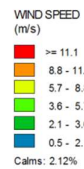

b

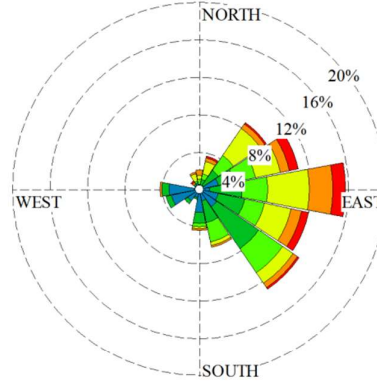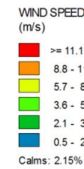

c

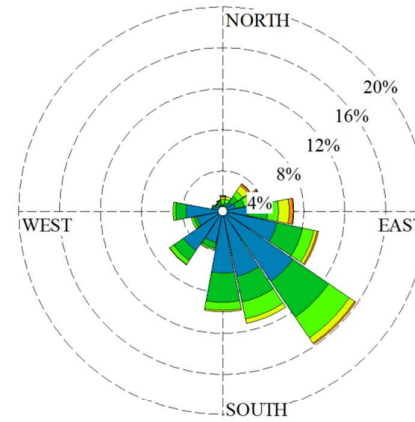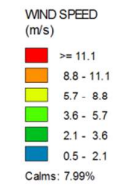

139

d

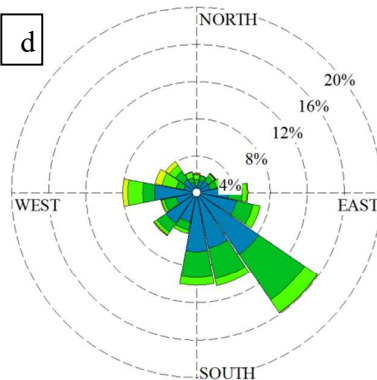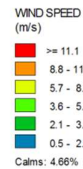

e

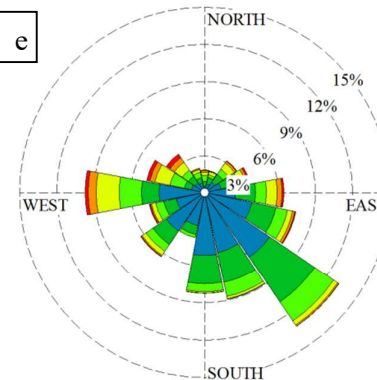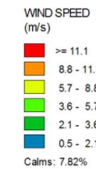

140

**Figure SI.2.11.** Wind roses showing wind speed and direction for the (a) monsoon, (b) post monsoon, (c) winter, (d) summer and (e) total monitoring period at the North site. Here and elsewhere, wind rose represent the direction from which wind blows

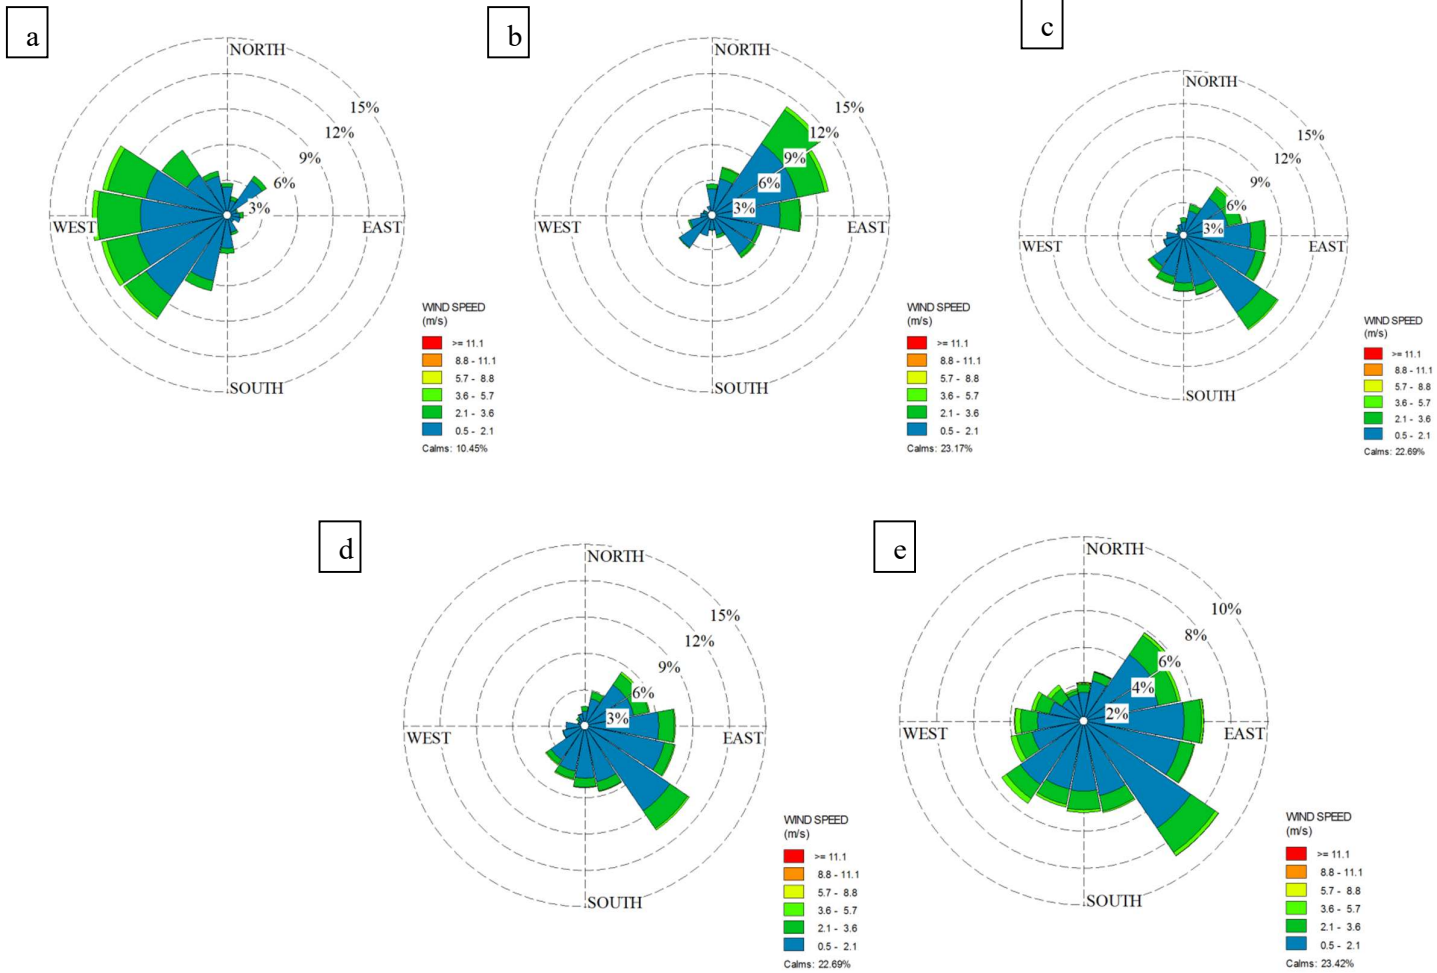

141

142

143

144

145

**Figure SI.2.12.** Wind roses showing wind speed and direction for the (a) monsoon, (b) post monsoon, (c) winter, (d) summer and (e) total monitoring period at Central site.

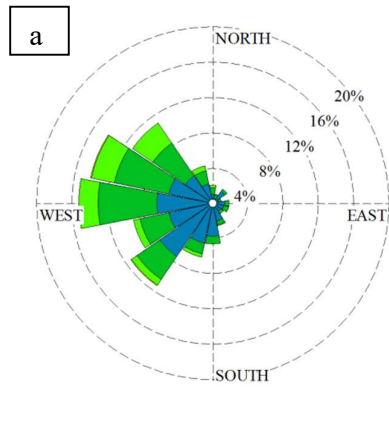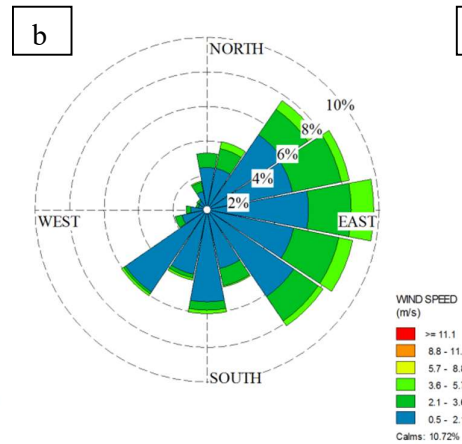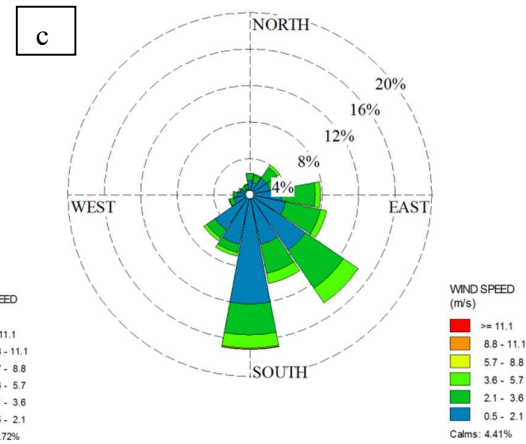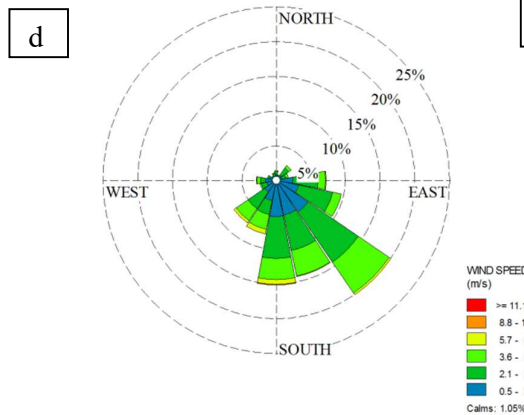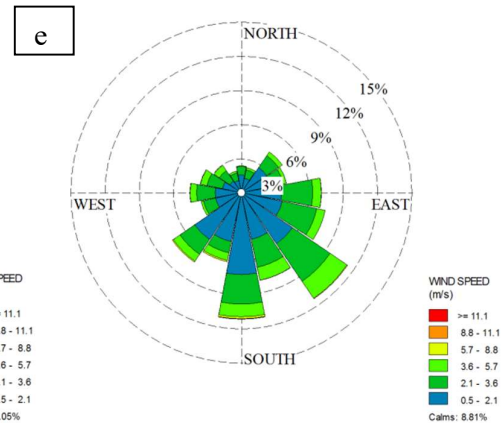

146

147

148

149

150

**Figure SI.2.13.** Wind roses showing wind speed and direction for the (a) monsoon, (b) post monsoon, (c) winter, (d) summer and (e) total monitoring period at South site

151

152

**Table SI.2.1.** PM<sub>2.5</sub> concentrations (µgm<sup>-3</sup>) during weekdays and weekends

|                                   | <b>North site</b> | <b>Central site</b> | <b>South site</b> |
|-----------------------------------|-------------------|---------------------|-------------------|
| <b>WeekendMedian (P25, P75)</b>   | 29 (18,41)        | 35 (22,45)          | 29 (19,37)        |
| <b>WeekdayMedian (P25, P75)</b>   | 29 (19,42)        | 37 (23,48)          | 30 (21,36)        |
| <b>Weekend (24 hr GM ×/÷GSD)</b>  | 28.723×/÷ 1.626   | 32.370×/÷1.576      | 28.506×/÷1.481    |
| <b>Weekday (24 hr GM ×/÷GSD)</b>  | 27.768×/÷1.606    | 32.450×/÷1.561      | 27.036×/÷1.467    |
| <b>All daysMedian (P25, P75)</b>  | 29 (18,41)        | 35 (23,46)          | 29 (20,37)        |
| <b>All days (24 hr GM ×/÷GSD)</b> | 28.040×/÷1.611    | 32.426×/÷1.564      | 27.433×/÷1.470    |

153

154

155

156

157

158

**Table SI.2.2** Season wise ratios of medians of 24h averaged PM<sub>2.5</sub> levels at the three ambient sites

| <b>Ratios</b>       | <b>Central<br/>North</b> | <b>Central<br/>South</b> | <b>North<br/>South</b> |
|---------------------|--------------------------|--------------------------|------------------------|
| <b>Monsoon</b>      | 1.03                     | 0.92                     | 0.84                   |
| <b>Post-Monsoon</b> | 1.01                     | 2.21                     | 2.1                    |
| <b>Winter</b>       | 1.19                     | 1.47                     | 1.21                   |
| <b>Summer</b>       | 0.99                     | 1.08                     | 1.13                   |
| <b>All days</b>     | 1.06                     | 1.23                     | 1.15                   |

159

160

161

162

163

164

**Table SI. 2.3.**Percentage of local concentrations computed based on moving average subtraction method at the different time intervals of a day.

| <b>Site</b>         | <b>Averagecontributions at different time scales</b> |               |               |               |               |               |
|---------------------|------------------------------------------------------|---------------|---------------|---------------|---------------|---------------|
|                     | (00:00-23:00)                                        | (00:00-05:00) | (05:00-09:00) | (09:00-17:00) | (17:00-20:00) | (20:00-23:00) |
| <b>North</b>        | 11                                                   | 12            | 17            | 6             | 9             | 14            |
| <b>Centra<br/>l</b> | 12                                                   | 6             | 25            | 8             | 17            | 9             |
| <b>South</b>        | 8                                                    | 7             | 16            | 5             | 7             | 7             |

165

166

167

168

169 **Table SI.2.4.** Percentage of local concentrations computed based on alternate underwriting  
 170 function at the different time intervals of a day

| Site    | Average contributions at different time scales |               |               |               |               |               |
|---------|------------------------------------------------|---------------|---------------|---------------|---------------|---------------|
|         | (00:00-23:00)                                  | (00:00-04:00) | (05:00-08:00) | (09:00-16:00) | (17:00-19:00) | (20:00-23:00) |
| North   | 25                                             | 25            | 35            | 17            | 24            | 30            |
| Central | 26                                             | 15            | 47            | 21            | 34            | 23            |
| South   | 20                                             | 18            | 33            | 16            | 20            | 21            |

171

172

173

174

175

176 **Table SI. 2.5.**Percentage of days with stagnation, recirculation, ventilation, and stagnation-  
 177 recirculation events at three rural sites

| Site         | Percentage of stagnation days | Percentage of recirculation days | Percentage of Ventilation days | Percentage of days with both stagnation and recirculation events |
|--------------|-------------------------------|----------------------------------|--------------------------------|------------------------------------------------------------------|
| North site   | 64                            | 44                               | 16                             | 29                                                               |
| Central site | 63                            | 41                               | 8                              | 34                                                               |
| South site   | 61                            | 49                               | 6                              | 29                                                               |

178

179

180

181

182 **Table SI. 2.6.**Percentage of stagnation, recirculation and ventilation events during monsoon,  
 183 post monsoon, winter and summer events at three rural sites.

| Site         | Event         | Monsoon | Post Monsoon | Winter | Summer | Annual |
|--------------|---------------|---------|--------------|--------|--------|--------|
| North site   | Stagnation    | 2       | 2            | 55     | 41     | 64     |
|              | Recirculation | 15      | 6            | 42     | 36     | 44     |
|              | Ventilation   | 51      | 15           | 22     | 12     | 16     |
| Central site | Stagnation    | 10      | 39           | 39     | 12     | 63     |
|              | Recirculation | 14      | 26           | 28     | 32     | 41     |
|              | Ventilation   | 55      | 5            | 20     | 20     | 8      |
| South site   | Stagnation    | 18      | 44           | 35     | 3      | 61     |
|              | Recirculation | 14      | 33           | 36     | 18     | 49     |
|              | Ventilation   | 50      | 7            | 14     | 29     | 6      |

184

185

186

187 **Table SI. 2.7.**Hourly median PM<sub>2.5</sub> concentrations (µg m<sup>-3</sup>) during wind speeds. The number  
 188 of hours of PM<sub>2.5</sub> episode occurrences is within brackets

| Wind speed (m/sec)     | North site | Central site | South site |
|------------------------|------------|--------------|------------|
| ≤0.5 (calm conditions) | 47 (156)   | 43(355)      | 34 (55)    |
| 0.6-2                  | 38 (222)   | 34(104)      | 31 (73)    |
| 2-4                    | 29 (83)    | 30(17)       | 29 (28)    |
| ≥4                     | 22(49)     | 23(0)        | 29 (4)     |

189

190

191

192

193 **Table SI.2.8.** Hourly median PM<sub>2.5</sub> concentrations (µg m<sup>-3</sup>) during various wind direction  
 194 periods at the three rural sites

| Wind direction | North site | Central site | South site |
|----------------|------------|--------------|------------|
| 0≤θ<45         | 32         | 41           | 37         |
| 45≤θ<90        | 37         | 40           | 34         |
| 90≤θ<135       | 35         | 38           | 31         |
| 135≤θ<180      | 34         | 36           | 30         |
| 180≤θ<225      | 32         | 40           | 31         |
| 225≤θ<270      | 30         | 37           | 29         |
| 270≤θ<315      | 29         | 36           | 27         |
| 315≤θ<360      | 27         | 40           | 31         |

195

196 **Table SI.2.9.**Average and standard deviations of monthly temperature and relative humidity  
 197 (RH) over the study area

|            | Temp (°C) |      | RH (%)  |       |
|------------|-----------|------|---------|-------|
|            | Average   | SD   | Average | SD    |
| <b>Jan</b> | 24.02     | 6.34 | 49.71   | 21.79 |
| <b>Feb</b> | 27.83     | 6.4  | 44.71   | 22.12 |
| <b>Mar</b> | 30.85     | 6.58 | 39.55   | 22.69 |
| <b>Apr</b> | 33.66     | 6.53 | 33.42   | 21.86 |
| <b>May</b> | 33.19     | 5.34 | 42.68   | 16.65 |
| <b>Jun</b> | 30.54     | 5.19 | 53.89   | 16.92 |
| <b>Jul</b> | 29.68     | 4.41 | 55.37   | 15.43 |
| <b>Aug</b> | 27.49     | 4.15 | 68.13   | 16.08 |
| <b>Sep</b> | 27.28     | 4.87 | 71.34   | 18.24 |
| <b>Oct</b> | 27.19     | 5.45 | 63.46   | 20.91 |
| <b>Nov</b> | 24.8      | 4.93 | 61.75   | 19.4  |
| <b>Dec</b> | 24.32     | 5.99 | 55.16   | 21.71 |

198

199
